# Supplementary material
Source: PubMed Central journal article supplement (PMC7047646)
Supplement: NIHMS1562386-supplement-1.pdf [file NIHMS1562386-supplement-1.pdf]

**Supplemental Table 1 Predictors of inpatient LOS**

| Variables             | 314 Patients             |                          | D-hgb $\geq$ 0           | 247 Patients             |  |
|-----------------------|--------------------------|--------------------------|--------------------------|--------------------------|--|
|                       | Univariate               | Multivariate             | Univariate               | Multivariate             |  |
|                       | Coef. (p)                | Coef. (p)                | Coef. (p)                | Coef. (p)                |  |
| <b>D-hgb</b>          | <b>1.41 (&lt;0.001)</b>  | <b>1.49 (&lt;0.001)</b>  | <b>1.90 (&lt;0.001)</b>  | <b>2.12 (&lt;0.001)</b>  |  |
| <b>Sthgb</b>          | <b>-0.47 (&lt;0.001)</b> | <b>-0.50 (&lt;0.001)</b> | <b>-0.38 (&lt;0.001)</b> | <b>-0.39 (&lt;0.001)</b> |  |
| <b>Albumin</b>        | <b>-1.40 (&lt;0.001)</b> | <b>-1.87 (&lt;0.001)</b> | <b>-0.86 (&lt;0.001)</b> | <b>-1.42 (&lt;0.001)</b> |  |
| <b>Male sex</b>       | <b>0.74 (0.055)</b>      | #                        | <b>0.39 (0.364)</b>      | *                        |  |
| <b>Age</b>            | <b>-0.02 (0.233)</b>     | *                        | <b>-0.01 (0.638)</b>     | *                        |  |
| <b>Comorbidities1</b> | <b>-1.82 (0.189)</b>     | #                        | <b>-1.51 (0.358)</b>     | *                        |  |
| <b>Comorbidities2</b> | <b>-1.74 (0.234)</b>     | *                        | <b>-1.43 (0.385)</b>     | *                        |  |
| <b>Comorbidities3</b> | <b>-0.49 (0.769)</b>     | *                        | <b>-0.17 (0.929)</b>     | *                        |  |
| <b>Comorbidities4</b> | <b>-0.97 (0.474)</b>     | *                        | <b>-0.42 (0.804)</b>     | *                        |  |

\*Predictor variables with  $p > 0.2$  were dropped from final multivariate model.

#Male sex and comorbidities had significant interactions with all hemoglobin levels and were dropped from final multivariate model.

**Supplemental Table 2 Predictors of 30-day unplanned readmissions rate**

| <b>Variables</b>      | <b>Univariate Analysis</b> | <b>Multivariate Analysis</b> |
|-----------------------|----------------------------|------------------------------|
|                       | <b>Odds Ratio (p)</b>      | <b>Odds Ratio (p)</b>        |
| <b>Lasthgb</b>        | <b>0.86 (0.136)</b>        | <b>0.82 (0.013)</b>          |
| <b>D-hgb</b>          | <b>1.19 (0.115)</b>        | <b>1.48 (0.154)</b>          |
| <b>Albumin</b>        | <b>1.01 (0.973)</b>        | <b>*</b>                     |
| <b>Male sex</b>       | <b>0.87 (0.672)</b>        | <b>*</b>                     |
| <b>Age</b>            | <b>0.96 (0.000)</b>        | <b>&amp;</b>                 |
| <b>Comorbidities1</b> | <b>0.20 (0.096)</b>        | <b>&amp;</b>                 |
| <b>Comorbidities2</b> | <b>0.86 (0.814)</b>        | <b>*</b>                     |
| <b>Comorbidities3</b> | <b>0.95 (0.920)</b>        | <b>*</b>                     |
| <b>Comorbidities4</b> | <b>1.67 0.357)</b>         | <b>*</b>                     |

\*Predictor variables with  $p > 0.2$  were dropped from final multivariate model.

&Age and comorbidities had significant interactions with all hemoglobin levels and were dropped from final multivariate model.
